# Supplementary material for: Role of Altered Metabolism of Triglyceride-Rich Lipoprotein Particles in the Development of Vascular Dysfunction in Systemic Lupus Erythematosus
Source: MDPI journal article supplement (doi:10.3390/biom13030401), 2023-02-21
Supplement: s1 [file s1]

**Supplementary Table S1.** Clinical phenotypes and concomitant diseases of patients with systemic lupus erythematosus (SLE); n=51.

|                               | n (%)     |
|-------------------------------|-----------|
| <b>Clinical phenotypes</b>    |           |
| Facial erythema               | 24 (47.1) |
| Polyarthritis                 | 37 (72.5) |
| Alopecia                      | 10 (19.6) |
| Pleuritis                     | 11 (21.6) |
| Pericarditis                  | 6 (11.8)  |
| Myocarditis                   | 1 (2)     |
| Alveolitis                    | 3 (5.9)   |
| Raynaud syndrome              | 11 (21.6) |
| Nephritis syndrome            | 3 (5.9)   |
| Antiphospholipid syndrome     | 3 (5.9)   |
| Photosensitivity              | 10 (19.6) |
| Autoimmune haemolytic anaemia | 5 (9.8)   |
| Oral ulcers                   | 2 (3.9)   |
| Depression                    | 1 (2)     |
| Psychosis                     | 0 (0)     |
| Migraine                      | 2 (3.9)   |
| Lymphadenomegaly              | 6 (11.8)  |
| Hepatomegaly                  | 4 (7.8)   |
| Splenomegaly                  | 3 (5.9)   |
| Myalgia                       | 2 (3.9)   |
| Polyneuropathy                | 2 (3.9)   |
| <b>Concomitant diseases</b>   |           |
| Hypertension                  | 2 (3.9)   |
| Type 2 diabetes mellitus      | 1 (2)     |
| Hypothyreosis                 | 2 (3.9)   |
| Mitral prolapse               | 2 (3.9)   |
| Irritable bowel syndrome      | 1 (2)     |
