# Supplementary material for: Role of Altered Metabolism of Triglyceride-Rich Lipoprotein Particles in the Development of Vascular Dysfunction in Systemic Lupus Erythematosus
Source: MDPI journal article supplement (doi:10.3390/biom13030401), 2023-02-21
Supplement: s1 [file s1]

**Supplementary Table S2.** Pearson correlations between laboratory parameters and augmentation index (Aix) in patients with systemic lupus erythematosus

| Variable                             | r     | p     |
|--------------------------------------|-------|-------|
| Age (yrs)                            | 0.27  | 0.08  |
| Body mass index (kg/m <sup>2</sup> ) | 0.23  | 0.44  |
| PWV (m/s)                            | 0.36  | 0.02  |
| FMD (%)                              | -0.2  | 0.19  |
| cIMT (cm)                            | -0.08 | 0.60  |
| SS-A (U/mL)                          | 0.01  | 0.92  |
| SS-B (U/mL)                          | -0.01 | 0.95  |
| C3 (g/L)                             | 0.11  | 0.47  |
| C4 (g/L)                             | -0.01 | 0.93  |
| Interleukine-6 (mg/L)                | 0.07  | 0.60  |
| C-reactive protein (mg/L)            | -0.04 | 0.79  |
| Total cholesterol (mmol/L)           | 0.30  | 0.054 |
| LDL-C (mmol/L)                       | 0.20  | 0.18  |
| HDL-C (mmol/L)                       | -0.06 | 0.68  |
| Triglyceride (mmol/L)                | 0.27  | 0.08  |
| ApoA1 (g/L)                          | 0.04  | 0.78  |
| ApoB100 (g/L)                        | 0.29  | 0.057 |
| <b>Lipoprotein subfractions</b>      |       |       |
| VLDL (mmol/L)                        | 0.31  | 0.04  |
| IDL-A (mmol/L)                       | 0.17  | 0.27  |
| IDL-B (mmol/L)                       | 0.29  | 0.05  |
| IDL-C (mmol/L)                       | 0.41  | 0.006 |
| LDL1 (mmol/L)                        | 0.29  | 0.059 |
| LDL2 (mmol/L)                        | 0.17  | 0.27  |
| LDL3 (mmol/L)                        | 0.12  | 0.42  |
| Mean LDL size (nm)                   | -0.07 | 0.63  |
| Large HDL (mmol/L)                   | 0.01  | 0.93  |
| Intermediate HDL (mmol/L)            | -0.14 | 0.34  |
| Small HDL (mmol/L)                   | 0.03  | 0.87  |

Abbreviations: ApoA1: apolipoprotein A1; ApoB100: apolipoprotein B100; C3: complement 3; C4: complement 4; cIMT: carotid intima-media thickness; FMD: flow-mediated dilation; HDL: high-density lipoprotein; IDL: intermediate-density lipoprotein; IL-6: interleukine-6; LDL: low-density lipoprotein; PWV: pulse wave velocity; SS-A: anti-Sjögren's-syndrome-related antigen A autoantibodies; SS-B: anti-Sjögren's-syndrome-related antigen B autoantibodies; VLDL: very low-density lipoprotein.
